# Supplementary material for: A molecular clamp ensures allosteric coordination of peptidyltransfer and ligand binding to the ribosomal A-site
Source: PubMed Central journal article supplement — Nucleic Acids Res. 2010 Jul 21;38(21):7800–13. doi: 10.1093/nar/gkq641 (PMC2995063; doi:10.1093/nar/gkq641), 2010-07-21
Supplement: supp_gkq641_Supplementary_Material.pdf [file supp_gkq641_Supplementary_Material.pdf]

## Supplementary Material

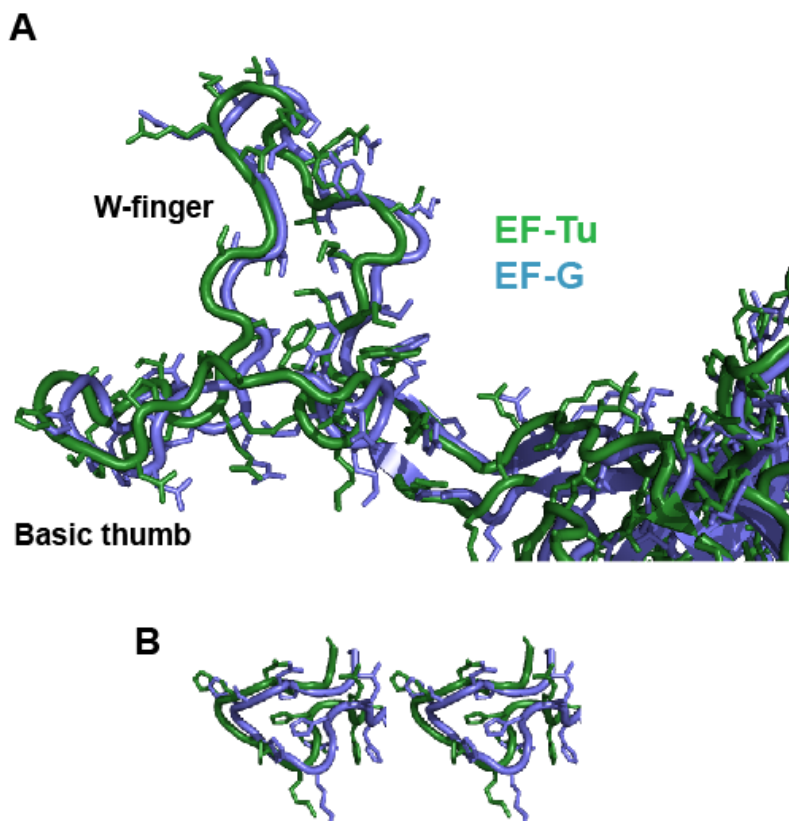

**Figure S1**

**Figure S1. Comparison of *T. thermophilus* L3 proteins between ribosomes complexed with EF-Tu.** The source files were PDB 2WRO (with EF-Tu) and PDB 2WRJ (with EF-G) (1).  $\alpha$ -carbon backbones are shown in cartoon mode, and sidechains are shown as sticks. **(A)** Wider view encompassing the entire W-finger including the distal tip and the basic thumb. **(B)** Stereoscopic view of the basic thumb region rotated to highlight differences in sidechain orientations.

## Reference

1. Gao, Y.G., Selmer, M., Dunham, C.M., Weixlbaumer, A., Kelley, A.C. and Ramakrishnan, V. (2009) The structure of the ribosome with elongation factor G trapped in the posttranslocational state. *Science*, **326**, 694-699.
